# Supplementary material
Source: Elsevier journal article supplement (https://www.sciencedirect.com/science/article/pii/S0021755718310246)
Supplement: mmc1 [file S0021755718310246:mmc1.docx]

JPED_2018-954 _ Material Suplementar

**Material Suplementar**

**Tabela suplementar 1 - Pontuação dos itens para o Índice de Qualidade da Alimentação**

|  |  |  | **Frequência semanal (pontuação)** | | | |
| --- | --- | --- | --- | --- | --- | --- |
| **COMPORTAMENTO** | | Desjejum | 7 | (+1) | 0 a 2 | (-1) |
| Refeições a mesa | 7 | (+1) | 0 a 2 | (-1) |
| **CONSUMO ALIMENTAR** | **BOA QUALIDADE** | Verdura crua | 7 | (+1) | 0 a 4 | (-1) |
| Legume | 7 | (+1) | 0 a 4 | (-1) |
| Fruta | 7 | (+1) | 0 a 2 | (-1) |
| Suco de fruta natural | 7 | (+1) | 0 a 4 | (-1) |
| Feijão | 7 | (+1) | 0 a 2 | (-1) |
| Leite | 7 | (+1) | 0 a 4 | (-1) |
| **MÁ QUALIDADE** | Doce | 0 a 2 | (+1) | 7 | (-1) |
| Biscoito | 0 a 2 | (+1) | 7 | (-1) |
| Refrigerante | 0 a 2 | (+1) | 7 | (-1) |
| Salgadinho | 0 a 2 | (+1) | 7 | (-1) |
| Batata frita | 0 a 1 | (+1) | 7 | (-1) |
| Maionese | 0a | (+1) | 7 | (-1) |
| Macarrão instantâneo | 0a | (+1) | 7 | (-1) |
| Hambúrguer | 0a | (+1) | 7 | (-1) |

0a, não come ou come raramente.
